# Supplementary figures and images for: B-lymphoid tyrosine kinase (Blk) is an oncogene and a potential target for therapy with dasatinib in cutaneous T-cell lymphoma (CTCL)
Source: PubMed Central journal article supplement — Leukemia. 2014 Jul 4;28(10):2109–12. doi: 10.1038/leu.2014.192 (PMC4190403; doi:10.1038/leu.2014.192), 2014-07-04

Figure S1.

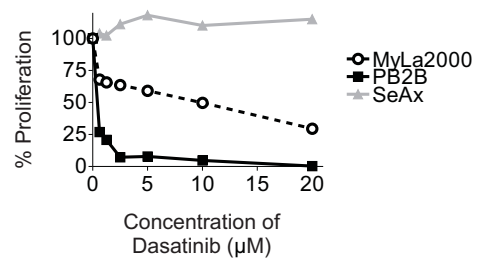

Supplement: leu2014192x1.pdf [file leu2014192x1.pdf]
